# Supplementary material
Source: PubMed Central journal article supplement (PMC3761300)
Supplement: supp_113.152587_152587SI.pdf [file supp_113.152587_152587SI.pdf]

## File S1

### Supporting Information

**Power and False Positive Rate.** In order to evaluate the power of SFselect and XP-SFselect to detect positive selection as compared to other neutrality tests, we applied these tests to several datasets simulated under different model parameters. For a given test on a given dataset, the power at 5% false positive rate (FPR) was estimated as the fraction of test-statistic values exceeding a set threshold when applied to the selected samples. The threshold was set to the top 5% of the null distribution, obtained by applying the test to neutral samples. For cross-populations tests (including XP-SFselect) we used the same procedure, only applying the test to selected vs. neutral samples, while the null was obtained by applying the test to neutral1 vs. neutral2 samples.

**SVM implementation details.** We used a linear (dot product) kernel function SVM. Linear kernels have two important advantages. First, because feature-weights learned by a linear SVM represent a maximum-margin separating hyperplane of the training data in the problem space (rather than in a higher dimensional space), they correspond to the relative importance of features in separating the training data, making the trained SVM easily interpretable. Secondly, normalization of the training and testing data is done in the input space, without the need for complicated normalization of the kernel function itself (Graf *et al.* 2003).

The SVM implementation we used was from the LIBSVM library (Chang and Lin 2011), packaged in the python library scikit-learn (Pedregosa *et al.* 2011). For the parameter-specific SVMs, where we lacked sufficient simulated data to hold the test data out of training, we report power as the mean over 50-fold cross validation. For the general two-stage SVM (SFselect and XP-SFselect), testing and training were done on completely separate datasets.

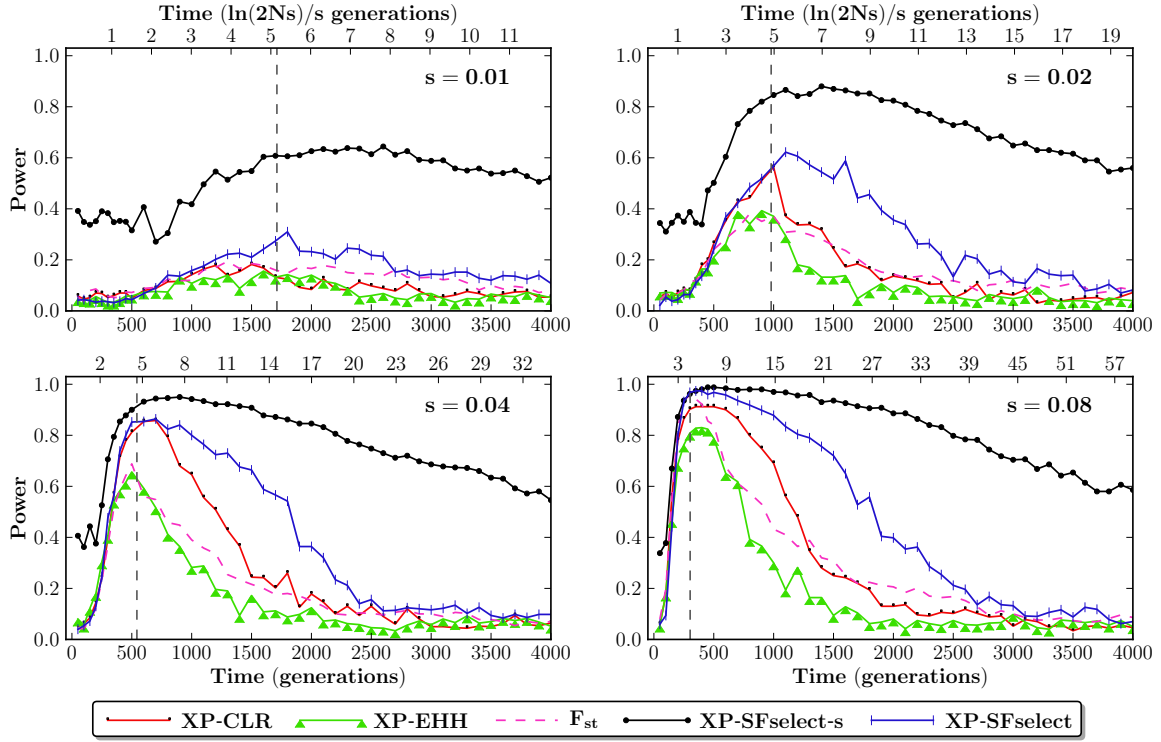

**Figure S1:** Power (0.05 FPR) of the cross-population SVM test compared to other cross-population tests of neutrality. Shown across selection pressures  $s \in [0.01, 0.08]$  and times  $\tau \in [0, 4000]$ . The (black) line labelled ‘XP-SFselect-s’ shows power when assuming knowledge of the selection coefficient and the time ( $s, \tau$ , respectively). The (blue) line labeled ‘XP-SFselect’ shows power when no prior knowledge of ( $s, \tau$ ) is assumed. Time is shown in generations (bottom axes), and  $\ln(2Ns)/s$  generations (top axes). The dashed vertical lines (grey) show the mean time to fixation of the beneficial allele, which occurs at  $\approx 5 \ln(2Ns)/s$  generations.

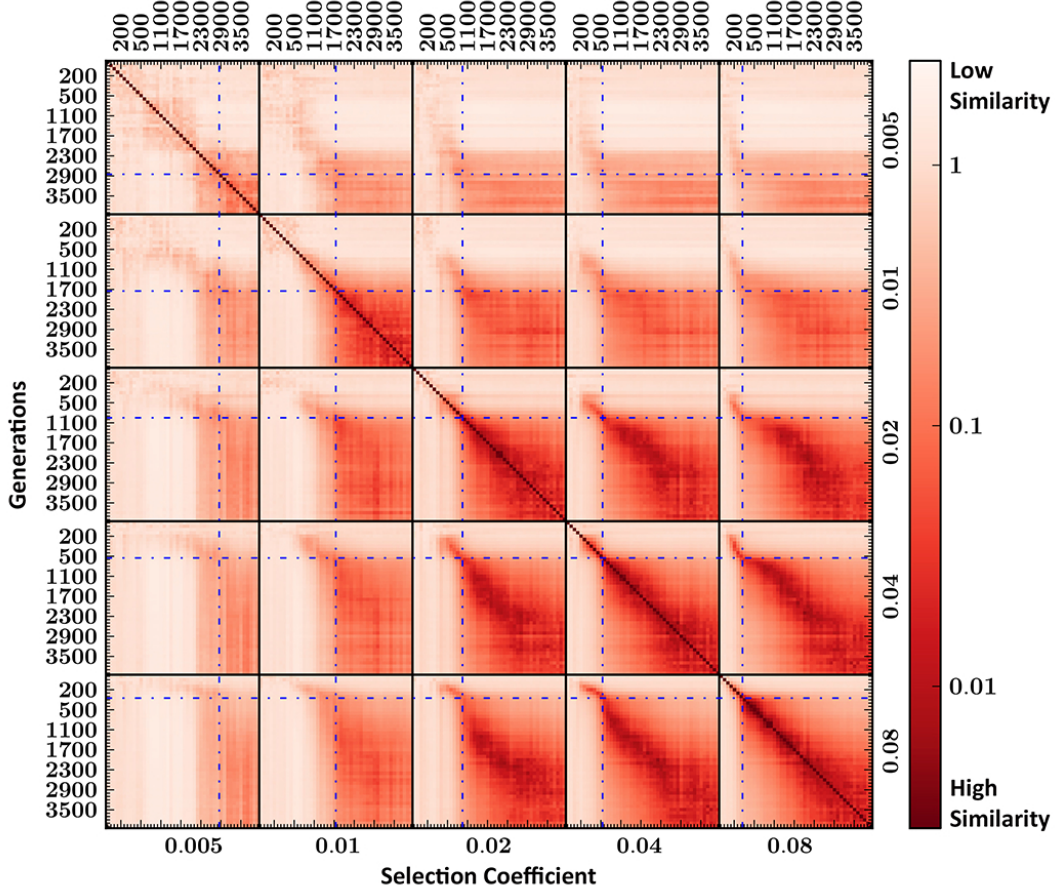

**Figure S2:** Pairwise cosine distance between 200 SVMs trained on cross-population data (matrices of the XP-SFS scaled to  $8 \times 8$  frequency bins, and vectorized). The data was simulated under different selection pressures  $s \in [0.005, 0.08]$ , and sampled at different times under selection  $\tau \in [0, 4000]$  generations. Selection pressure boundaries are denoted by black lines, and mean time to fixation for each pressure is denoted by dashed blue lines. We observe two main similarity blocks at each selection pressure, corresponding to "near fixation" and "post-fixation" of the beneficial allele. The stronger the selection pressure (e.g., bottom right) the earlier and shorter the near-fixation stage, and vice versa.

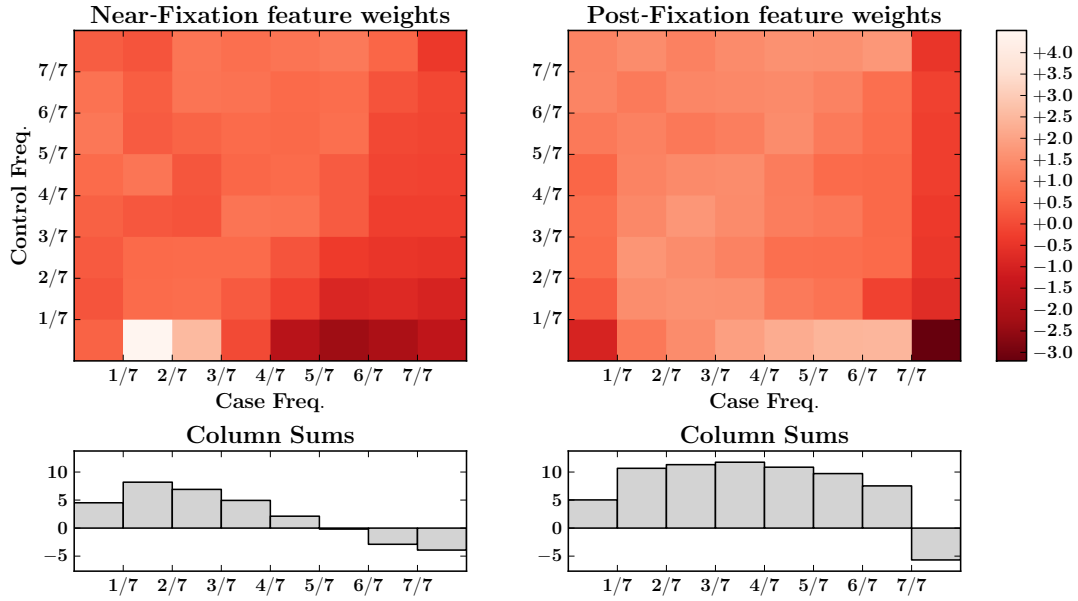

**Figure S3:** Feature weights learned from the XP-SFS on data corresponding to the two observed regimes of selection: (A) near-fixation, and (B) post-fixation. Minor allele frequencies were distributed to  $8 \times 8$  bins, where the rightmost column (top row) was dedicated to alleles fixed in the selected (neutral) population. Decision function constants were  $\beta_0 = -0.80$ , and  $\beta_0 = -0.56$  for the near-fixation, and post-fixation SVMs, respectively.

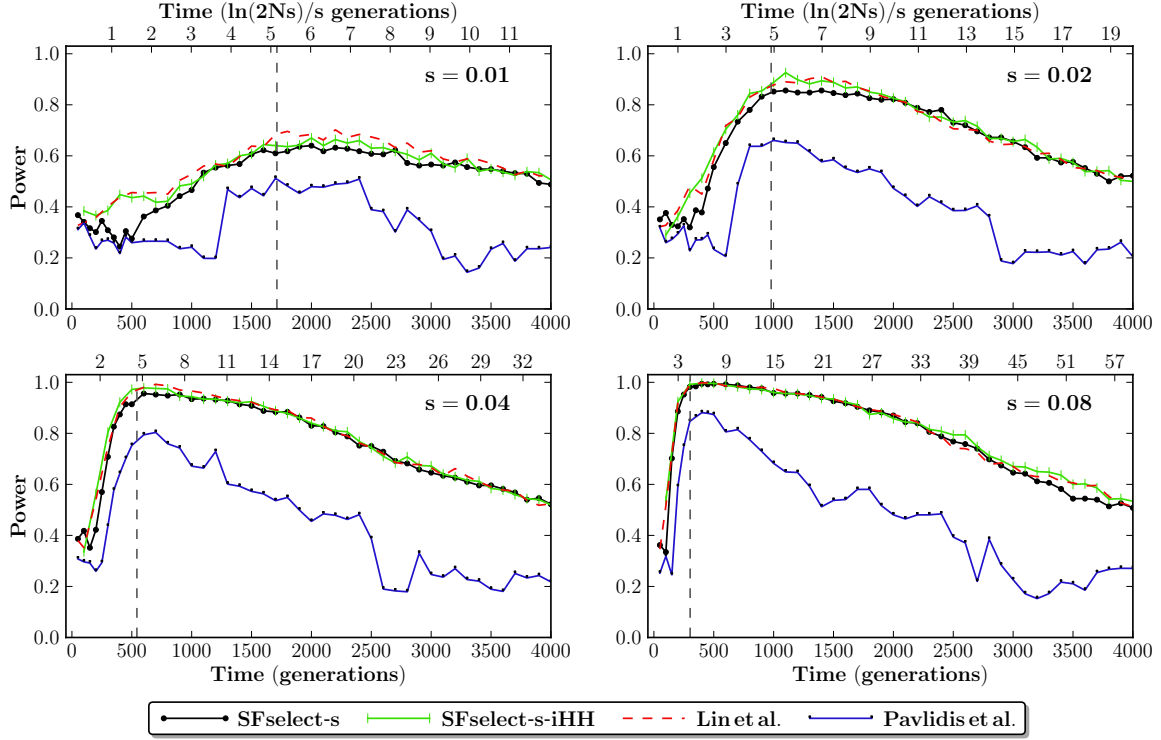

**Figure S4: Power (0.05 FPR) of neutrality tests based on supervised learning.** The line labelled ‘SFselect-s’ shows power of the regular parameter-specific SVMs, while the line labelled ‘SFselect-s-iHH’ shows power when including the iHH features described in Lin *et al.* (2011). Shown for selection pressures  $s \in [0.01, 0.08]$  and times  $\tau \in [0, 4000]$ , with time in generations (bottom axes), and  $\ln(2Ns)/s$  generations (top axes). The dashed vertical lines (grey) show the mean time to fixation of the beneficial allele, which occurs at  $\approx 5 \ln(2Ns)/s$  generations.

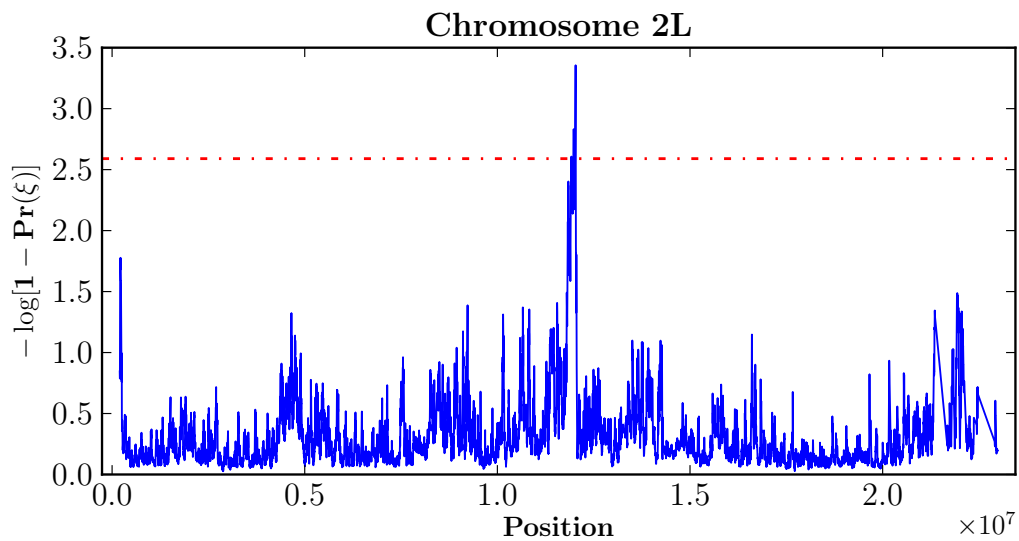

**Figure S5:** XP-SFselect values on Drosophila chromosome 2L.

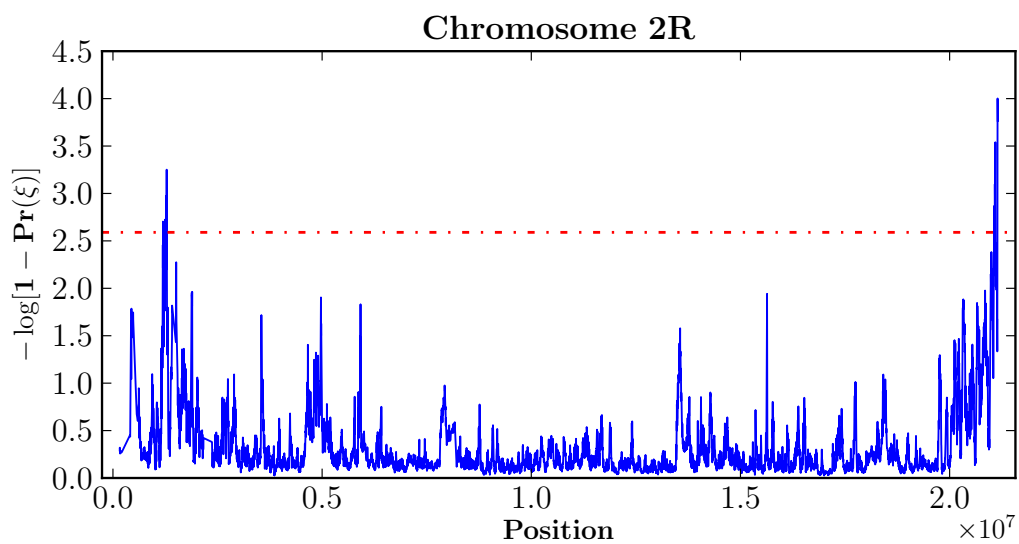

**Figure S6:** XP-SFselect values on Drosophila chromosome 2R.

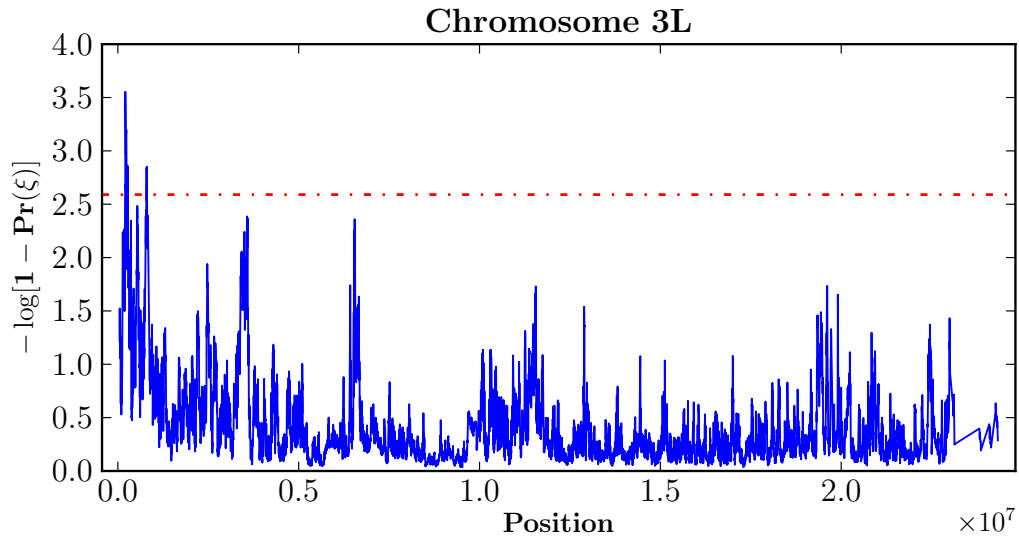

**Figure S7:** XP-SFselect values on *Drosophila* chromosome 3L.

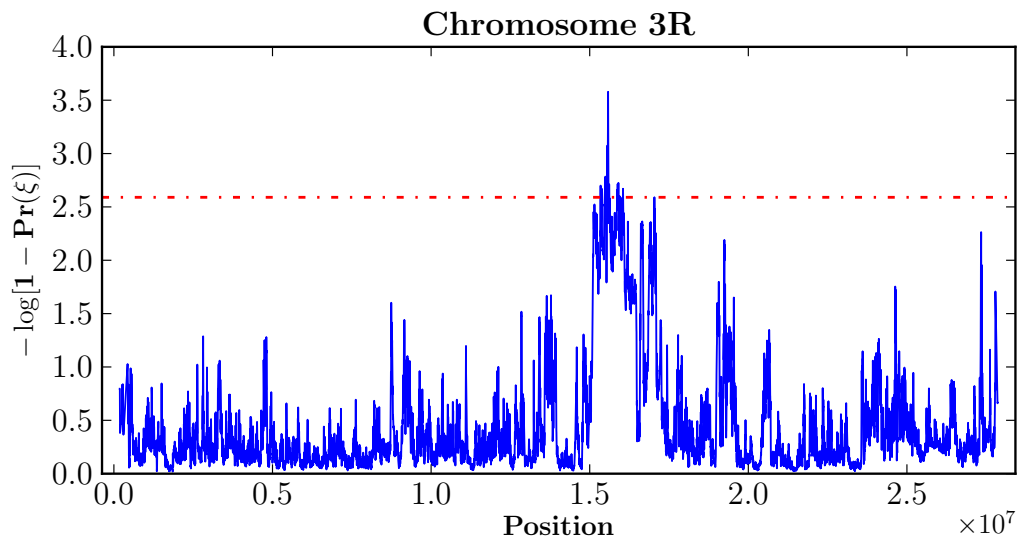

**Figure S8:** XP-SFselect values on *Drosophila* chromosome 3R.

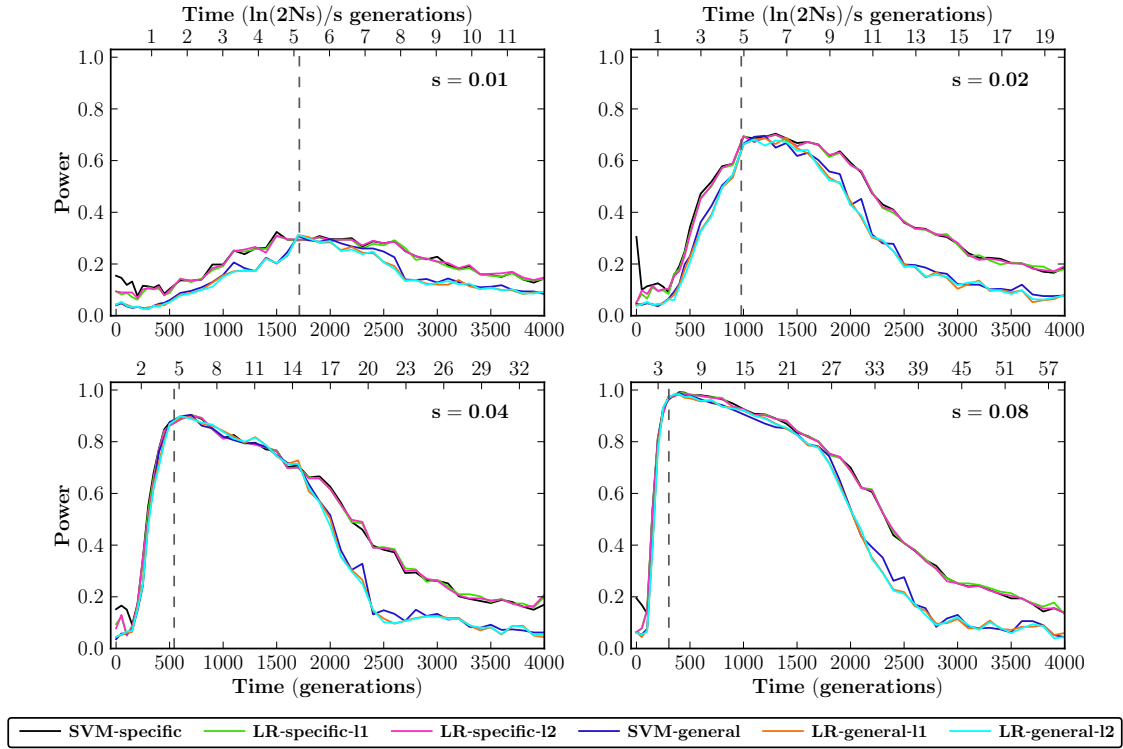

**Figure S9:** Power of SFselect using SVM and logistic regression, at different times and selection pressures. Performance appears nearly identical regardless of the underlying classification method. In the legend, 'l1' and 'l2' refer to the regularization term used with logistic regression.

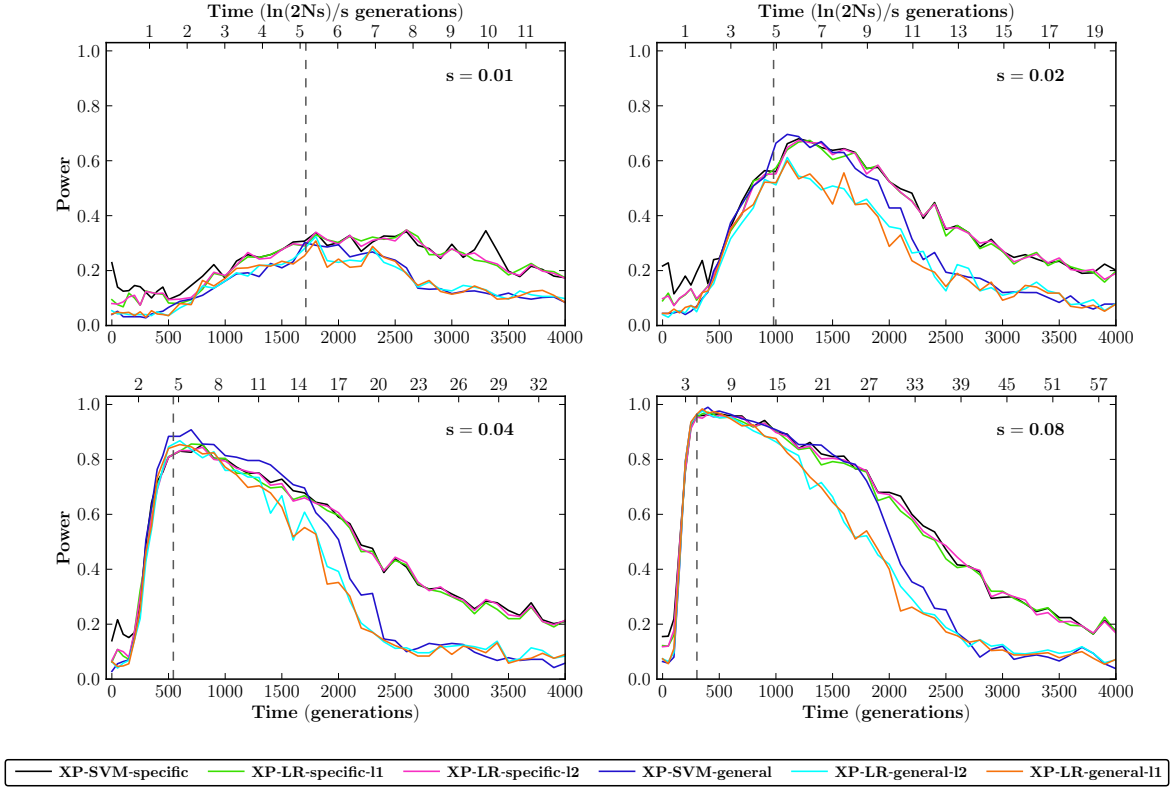

**Figure S10:** Power of XP-SFselect using SVM and logistic regression, at different times and selection pressures. We observe a marked decrease in power (cyan and orange (LR) compared to blue (SVM)) with logistic regression. In the legend, 'l1' and 'l2' refer to the regularization term used with logistic regression.

**Table S1: List of significant regions under XP-SFselect for the fly hypoxia experiments described in Zhou *et al.* (2011).**

| Chr | Region             | XP-SFselect |
|-----|--------------------|-------------|
| 2L  | 11895542-12055542  | 3.36        |
| 2R  | 170962-1308962     | 3.25        |
| 2R  | 1040962-21174962   | 4.00        |
| 3L  | 175762-301762      | 3.55        |
| 3L  | 763762-833762      | 2.85        |
| 3R  | 15318233-15642233* | 3.58        |
| 3R  | 15846233-16076233* | 2.73        |
| 3R  | 17014233-17064233  | 2.59        |
| X   | 378615-440615      | 2.78        |
| X   | 676615-728615*     | 2.60        |
| X   | 1420615-1480615    | 2.70        |
| X   | 2046615-2122615    | 4.77        |
| X   | 2630615-2758615    | 3.91        |
| X   | 2872615-3444615    | 3.89        |
| X   | 4818615-4892615    | 3.60        |
| X   | 12996615-13374615* | 4.02        |
| X   | 15092615-15160615  | 2.84        |
| X   | 16110615-16160615* | 2.62        |
| X   | 16276615-16488615* | 4.86        |
| X   | 18154615-18248615  | 2.87        |
| X   | 18564615-18686615* | 2.60        |
| X   | 18838615-18930615* | 3.08        |
| X   | 19092615-19358615* | 3.74        |
| X   | 20504615-20986615* | 4.18        |
| X   | 22064615-22412615* | 4.24        |

\*Shared with  $S_f$

**Table S2: The top 40 non-overlapping regions identified genome-wide by XP-SFselect.**

| Chr | Position (Mb) | Max XP-SFselect | Genes                                    | Study                                                       |
|-----|---------------|-----------------|------------------------------------------|-------------------------------------------------------------|
| X   | 66.10-66.56   | 4.38657         |                                          |                                                             |
| 12  | 88.24-88.36   | 4.38258         |                                          |                                                             |
| X   | 99.00-99.16   | 4.34082         | LOC442459                                | Frazer <i>et al.</i> (2007)                                 |
| 8   | 52.67-52.82   | 4.31338         | PXDNL, PCMTD1                            | (Frazer <i>et al.</i> 2007)                                 |
| X   | 35.27-35.38   | 4.27039         |                                          |                                                             |
| 12  | 123.61-123.78 | 4.20905         | MPHOSPH9, C12orf65,<br>CDK2AP1, SBNO1    |                                                             |
| 12  | 88.90-89.00   | 4.20736         | KITLG                                    | (Pickrell <i>et al.</i> 2009)                               |
| 4   | 148.54-148.79 | 4.19501         | TMEM184C, PRMT10,<br>ARHGAP10            |                                                             |
| 10  | 100.78-100.94 | 4.19111         | HPSE2                                    |                                                             |
| 10  | 31.47-31.55   | 4.14863         |                                          | (Chen <i>et al.</i> 2010)                                   |
| X   | 110.08-110.37 | 4.13684         | PAK3                                     | (Sabeti <i>et al.</i> 2007);<br>(Frazer <i>et al.</i> 2007) |
| 2   | 13.69-13.90   | 4.12967         |                                          |                                                             |
| 11  | 105.99-106.22 | 4.11825         |                                          |                                                             |
| X   | 80.24-80.38   | 4.10921         | HMG5                                     |                                                             |
| 13  | 71.98-72.12   | 4.10127         | DACH1                                    |                                                             |
| 4   | 52.88-53.14   | 4.09292         | LRRC66, SGCB, SPATA18                    |                                                             |
| 2   | 150.39-150.49 | 4.07069         | MMADHC                                   |                                                             |
| 15  | 44.29-44.39   | 4.05108         | FRMD5                                    |                                                             |
| 1   | 142.66-142.87 | 4.04074         |                                          |                                                             |
| 11  | 40.22-40.32   | 4.02215         | LRRC4C                                   |                                                             |
| 16  | 15.14-15.30   | 4.01629         | NTAN1, RRN3, MIR3180-4                   |                                                             |
| 2   | 97.68-97.85   | 3.99585         | FAHD2B, ANKRD36                          |                                                             |
| 4   | 159.35-159.44 | 3.9884          |                                          |                                                             |
| 2   | 104.76-104.83 | 3.97891         |                                          |                                                             |
| 17  | 73.30-73.44   | 3.96581         | GRB2, MIR3678                            |                                                             |
| 20  | 60.66-60.73   | 3.93865         | LSM14B, PSMA7, SS18L1                    |                                                             |
| 4   | 41.96-42.11   | 3.93681         | TMEM33, DCAF4L1,<br>SLC30A9              |                                                             |
| 15  | 28.19-28.27   | 3.91923         | OCA2                                     | (Chen <i>et al.</i> 2010)                                   |
| 1   | 158.15-158.24 | 3.89804         | CD1D, CD1A                               |                                                             |
| 13  | 41.39-41.54   | 3.8952          | SUGT1P3, ELF1                            |                                                             |
| 1   | 100.67-100.77 | 3.88985         | DBT, RTCD1, MIR553                       |                                                             |
| X   | 65.54-65.91   | 3.87444         | EDA2R                                    |                                                             |
| 17  | 53.79-53.87   | 3.87161         | TMEM100, PCTP                            |                                                             |
| 18  | 30.40-30.58   | 3.86989         | C18orf34                                 |                                                             |
| 1   | 248.07-248.16 | 3.86911         | OR2T8, OR2L13, OR2L81,<br>OR2AK2, OR2L1P |                                                             |
| 16  | 79.80-79.88   | 3.86909         |                                          | (Chen <i>et al.</i> 2010);<br>(Frazer <i>et al.</i> 2007)   |
| X   | 108.00-108.15 | 3.82083         |                                          |                                                             |
| 18  | 15.04-15.15   | 3.81846         |                                          | (Frazer <i>et al.</i> 2007)                                 |
| 2   | 167.50-167.60 | 3.81693         |                                          |                                                             |
| X   | 74.42-74.72   | 3.80593         | UPRT, ZDHHC15                            |                                                             |

The right-most column specifies the studies, if any, in which the corresponding regions were reported as showing signal of selection.

**Table S3: Potentially damaging SNPs found in regions with strong evidence of non-neutral evolution.**

| Chr | Position  | rsID       | AA            | SIFT       | Gene           | ENSEMBL         | CEU   | YRI  |
|-----|-----------|------------|---------------|------------|----------------|-----------------|-------|------|
| 1   | 11090916  | rs12711521 | D371Y         | $p = 0.04$ | MASP2          | ENST00000400897 | 0.86  | 0.1  |
| 1   | 248084909 | rs34508376 | M197R         | $p=0.01$   | OR2T8          | ENST00000319968 | 0.64  | 0.05 |
| 1   | 248113026 | rs10888281 | Y289*         | —          | OR2L8          | ENST00000357191 | 0.94  | 0.25 |
| 1   | 248129240 | rs4478844  | V203M         | $p=0.00$   | OR2AK2         | ENST00000366480 | 0.67  | 0.05 |
| 2   | 27424636  | rs1395     | S481F         | $p=0.05$   | SLC5A6         | ENST00000310574 | 0.74  | 0.16 |
| 5   | 138720108 | rs11242462 | W45*          | —          | SLC23A1        | ENST00000508270 | 0.29  | 0.80 |
| 5   | 177378959 | rs7720935  | <i>splice</i> | —          | RP11-423H2.3.1 | ENST00000507072 | 0.94  | 0.40 |
| 8   | 16043667  | rs435815   | <i>splice</i> | —          | MSR1           | ENST00000445506 | 0.11  | 0.54 |
| 19  | 44932972  | rs1434579  | G662R         | $p=0.04$   | ZNF229         | ENST00000291187 | 0.40  | 0.04 |
| 20  | 2291722   | rs6048066  | I163L         | $p=0.01$   | TGM3           | ENST00000420960 | 0.006 | 0.49 |

SNPs found in the top 0.2% of XP-SFselect regions, deemed damaging by SIFT (nonsynonymous, with  $p\text{-value} \leq 0.05$ ) or SnpEff (nonsense or splice-site variant). Frequencies in CEU and YRI populations also shown. Splice site donor mutations are indicated by *splice* in the AA column.
