# Supplementary material
Source: PubMed Central journal article supplement (PMC3761300)
Supplement: supp_113.152587_FigureS1.pdf [file supp_113.152587_FigureS1.pdf]

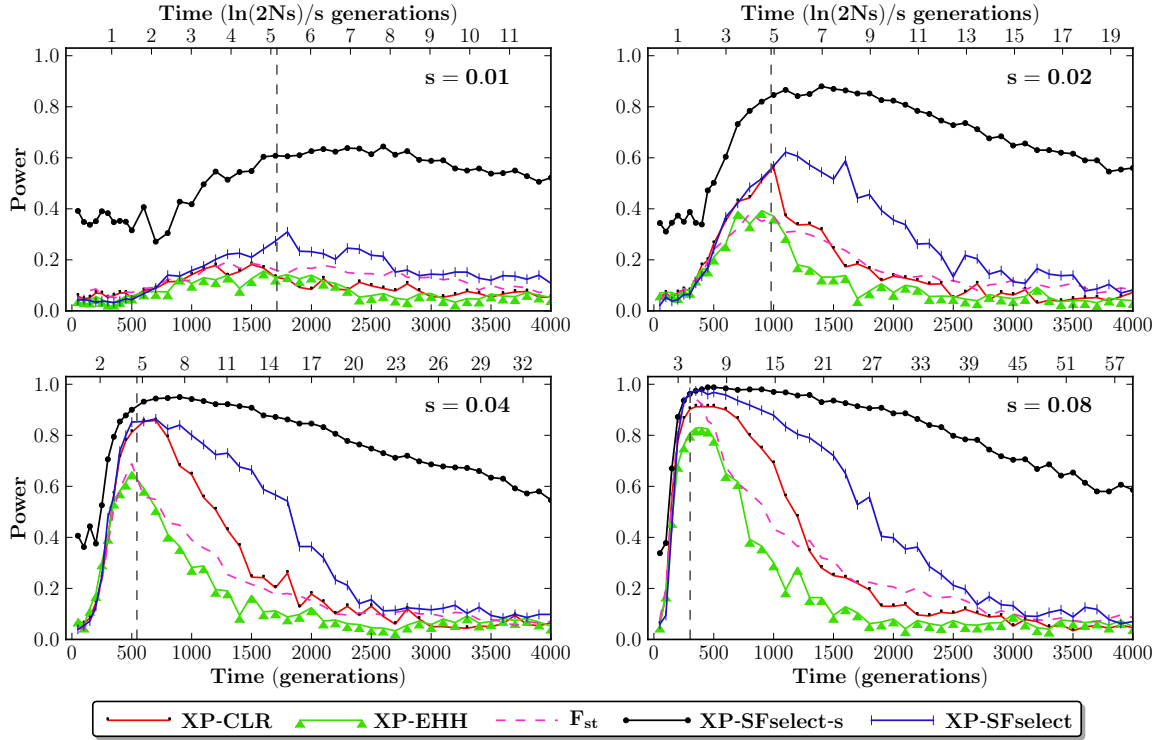

**Figure S1:** Power (0.05 FPR) of the cross-population SVM test compared to other cross-population tests of neutrality. Shown across selection pressures  $s \in [0.01, 0.08]$  and times  $\tau \in [0, 4000]$ . The (black) line labelled ‘XP-SFselect- $s$ ’ shows power when assuming knowledge of the selection coefficient and the time ( $\tau$  and  $s$ , respectively). The (blue) line labeled ‘XP-SFselect’ shows power when no prior knowledge of  $(s, \tau)$  is assumed. Time is shown in generations (bottom axes), and  $\ln(2Ns)/s$  generations (top axes). The dashed vertical lines (grey) show the mean time to fixation of the beneficial allele, which occurs at  $\approx 5 \ln(2Ns)/s$  generations.
