# Supplementary material
Source: PubMed Central journal article supplement (PMC3761300)
Supplement: supp_113.152587_FigureS3.pdf [file supp_113.152587_FigureS3.pdf]

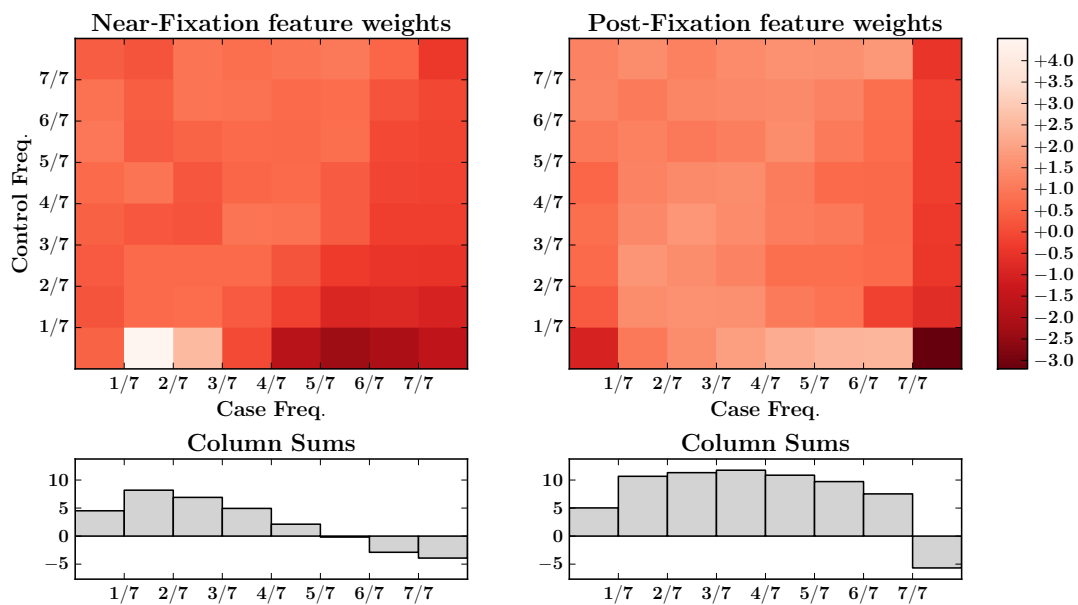

**Figure S3:** Feature weights learned from the XP-SFS on data corresponding to the two observed regimes of selection: (A) near-fixation, and (B) post-fixation. Minor allele frequencies were distributed to  $8 \times 8$  bins, where the rightmost column (top row) was dedicated to alleles fixed in the selected (neutral) population. Decision function constants were  $\beta_0 = -0.80$ , and  $\beta_0 = -0.56$  for the near-fixation, and post-fixation SVMs, respectively.
