# Supplementary material
Source: PubMed Central journal article supplement (PMC3761300)
Supplement: supp_113.152587_FigureS4.pdf [file supp_113.152587_FigureS4.pdf]

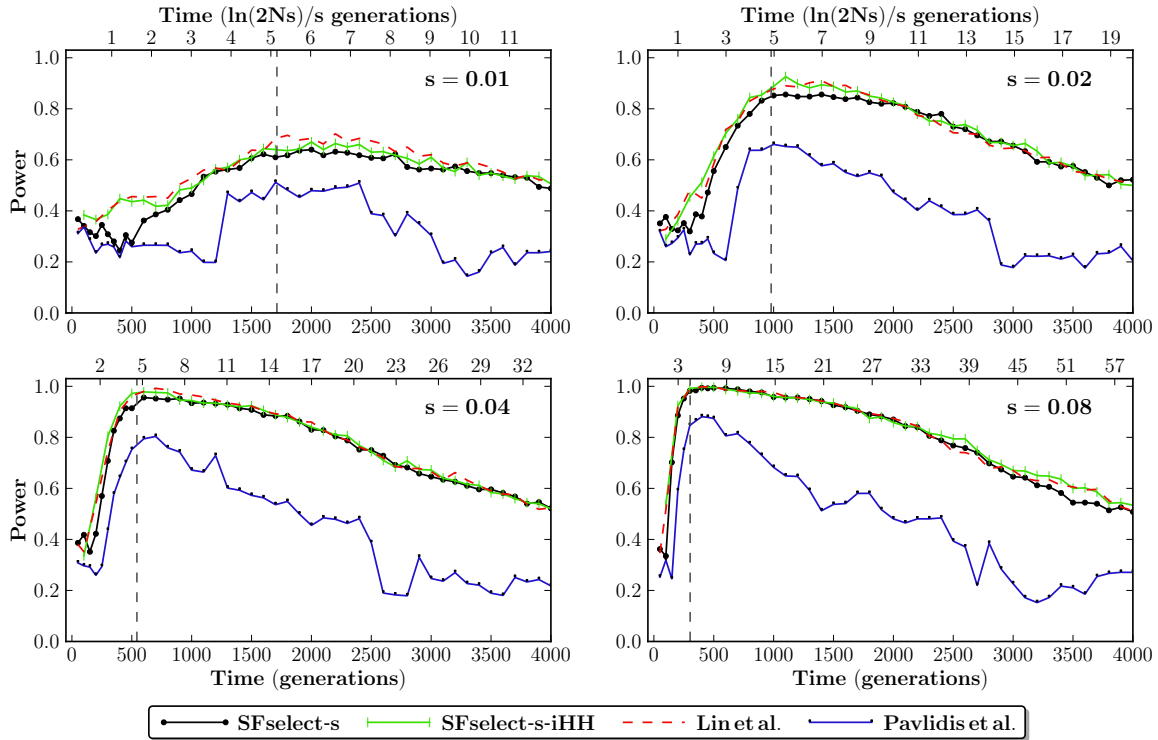

**Figure S4: Power (0.05 FPR) of neutrality tests based on supervised learning.** The line labelled ‘SFselect- $s$ ’ shows power of the regular parameter-specific SVMs, while the line labelled ‘SFselect- $s$ -iHH’ shows power when including the iHH features described in Lin *et al.* (2011). Shown for selection pressures  $s \in [0.01, 0.08]$  and times  $\tau \in [0, 4000]$ , with time in generations (bottom axes), and  $\ln(2Ns)/s$  generations (top axes). The dashed vertical lines (grey) show the mean time to fixation of the beneficial allele, which occurs at  $\approx 5 \ln(2Ns)/s$  generations.
