# Supplementary material
Source: PubMed Central journal article supplement (PMC3761300)
Supplement: supp_113.152587_FigureS9.pdf [file supp_113.152587_FigureS9.pdf]

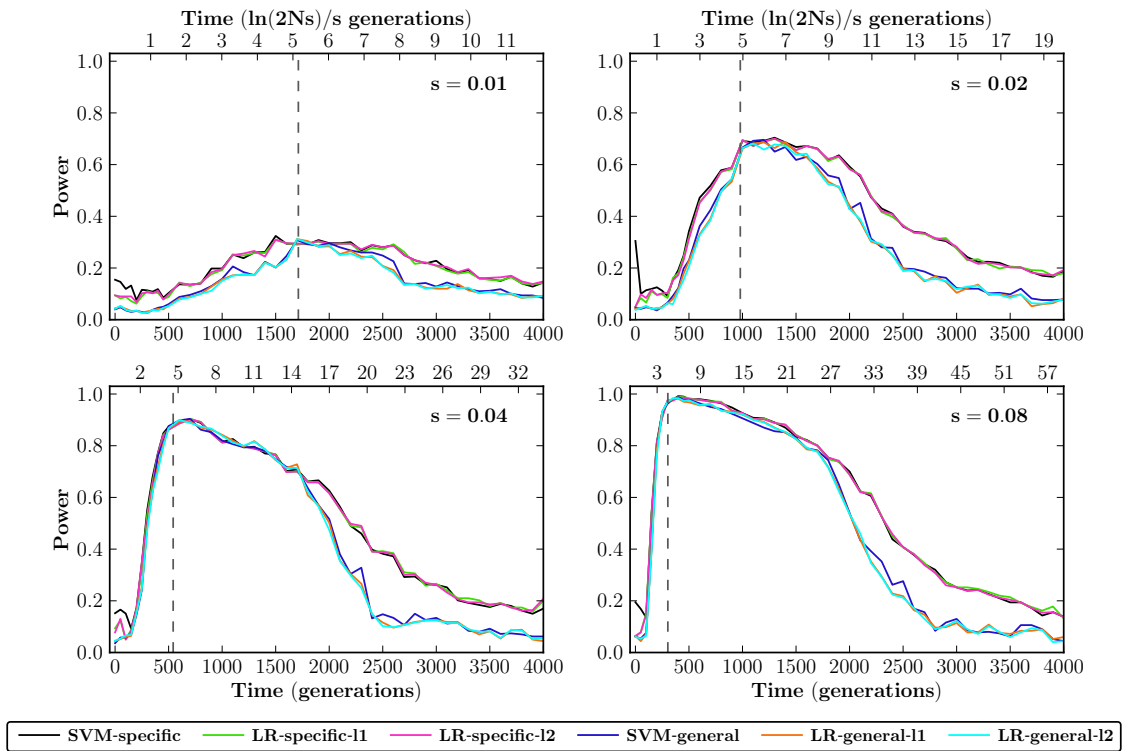

**Figure S9:** Power of SFselect using SVM and logistic regression, at different times and selection pressures. Performance appears nearly identical regardless of the underlying classification method. In the legend, '11' and '12' refer to the regularization term used with logistic regression.
