# Supplementary material
Source: PubMed Central journal article supplement (PMC3761300)
Supplement: supp_113.152587_FigureS10.pdf [file supp_113.152587_FigureS10.pdf]

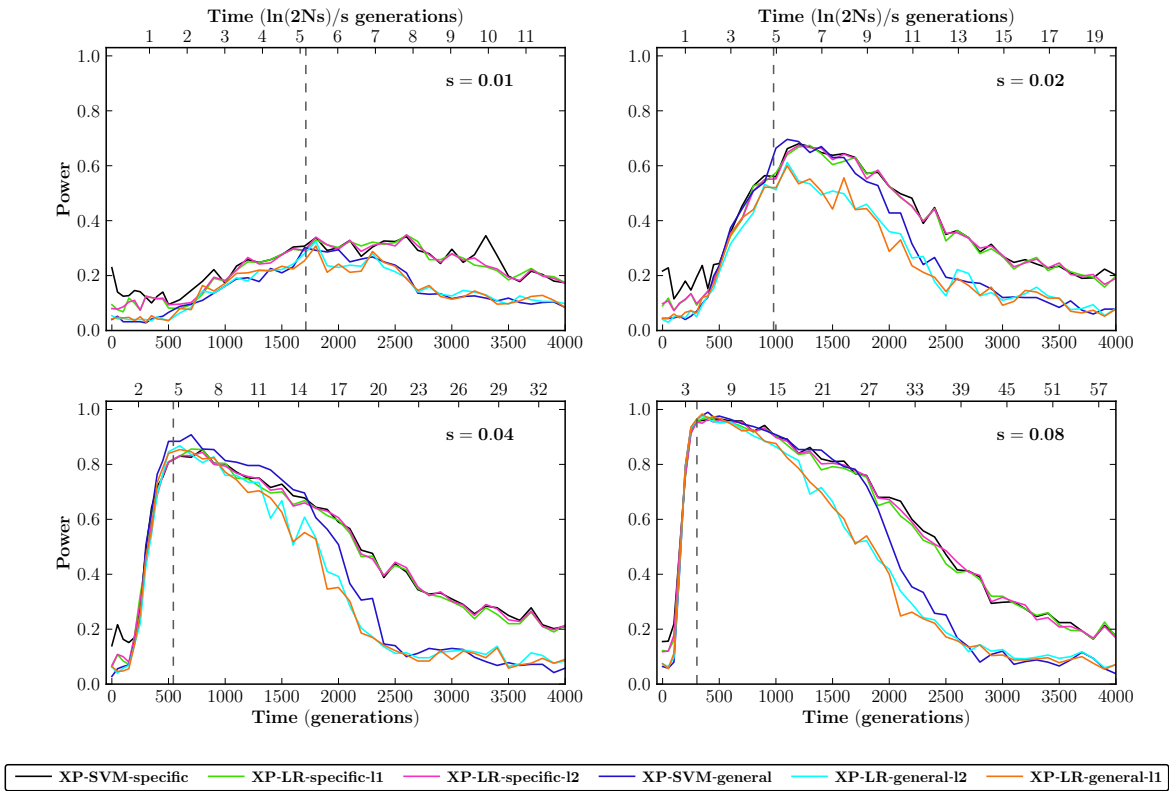

**Figure S10:** Power of XP-SFselect using SVM and logistic regression, at different times and selection pressures. We observe a marked decrease in power (cyan and orange (LR) compared to blue (SVM)) with logistic regression. In the legend, 'l1' and 'l2' refer to the regularization term used with logistic regression.
