# Supplementary material
Source: PubMed Central journal article supplement (PMC3761300)
Supplement: supp_113.152587_TableS1.pdf [file supp_113.152587_TableS1.pdf]

**Table S1: List of significant regions under XP-SFselect for the fly hypoxia experiments described in Zhou *et al.* (2011).**

| Chr | Region             | XP-SFselect |
|-----|--------------------|-------------|
| 2L  | 11895542-12055542  | 3.36        |
| 2R  | 170962-1308962     | 3.25        |
| 2R  | 1040962-21174962   | 4.00        |
| 3L  | 175762-301762      | 3.55        |
| 3L  | 763762-833762      | 2.85        |
| 3R  | 15318233-15642233* | 3.58        |
| 3R  | 15846233-16076233* | 2.73        |
| 3R  | 17014233-17064233  | 2.59        |
| X   | 378615-440615      | 2.78        |
| X   | 676615-728615*     | 2.60        |
| X   | 1420615-1480615    | 2.70        |
| X   | 2046615-2122615    | 4.77        |
| X   | 2630615-2758615    | 3.91        |
| X   | 2872615-3444615    | 3.89        |
| X   | 4818615-4892615    | 3.60        |
| X   | 12996615-13374615* | 4.02        |
| X   | 15092615-15160615  | 2.84        |
| X   | 16110615-16160615* | 2.62        |
| X   | 16276615-16488615* | 4.86        |
| X   | 18154615-18248615  | 2.87        |
| X   | 18564615-18686615* | 2.60        |
| X   | 18838615-18930615* | 3.08        |
| X   | 19092615-19358615* | 3.74        |
| X   | 20504615-20986615* | 4.18        |
| X   | 22064615-22412615* | 4.24        |

\*Shared with  $S_f$
