# Supplementary material
Source: PubMed Central journal article supplement (PMC3761300)
Supplement: supp_113.152587_TableS2.pdf [file supp_113.152587_TableS2.pdf]

**Table S2: The top 40 non-overlapping regions identified genome-wide by XP-SFselect.**

| Chr | Position (Mb) | Max XP-SFselect | Genes                                    | Study                                                       |
|-----|---------------|-----------------|------------------------------------------|-------------------------------------------------------------|
| X   | 66.10-66.56   | 4.38657         |                                          |                                                             |
| 12  | 88.24-88.36   | 4.38258         |                                          |                                                             |
| X   | 99.00-99.16   | 4.34082         | LOC442459                                | Frazer <i>et al.</i> (2007)                                 |
| 8   | 52.67-52.82   | 4.31338         | PXDNL, PCMTD1                            | (Frazer <i>et al.</i> 2007)                                 |
| X   | 35.27-35.38   | 4.27039         |                                          |                                                             |
| 12  | 123.61-123.78 | 4.20905         | MPHOSPH9, C12orf65,<br>CDK2AP1, SBNO1    |                                                             |
| 12  | 88.90-89.00   | 4.20736         | KITLG                                    | (Pickrell <i>et al.</i> 2009)                               |
| 4   | 148.54-148.79 | 4.19501         | TMEM184C, PRMT10,<br>ARHGAP10            |                                                             |
| 10  | 100.78-100.94 | 4.19111         | HPSE2                                    |                                                             |
| 10  | 31.47-31.55   | 4.14863         |                                          | (Chen <i>et al.</i> 2010)                                   |
| X   | 110.08-110.37 | 4.13684         | PAK3                                     | (Sabeti <i>et al.</i> 2007);<br>(Frazer <i>et al.</i> 2007) |
| 2   | 13.69-13.90   | 4.12967         |                                          |                                                             |
| 11  | 105.99-106.22 | 4.11825         |                                          |                                                             |
| X   | 80.24-80.38   | 4.10921         | HMG5                                     |                                                             |
| 13  | 71.98-72.12   | 4.10127         | DACH1                                    |                                                             |
| 4   | 52.88-53.14   | 4.09292         | LRRC66, SGCB, SPATA18                    |                                                             |
| 2   | 150.39-150.49 | 4.07069         | MMADHC                                   |                                                             |
| 15  | 44.29-44.39   | 4.05108         | FRMD5                                    |                                                             |
| 1   | 142.66-142.87 | 4.04074         |                                          |                                                             |
| 11  | 40.22-40.32   | 4.02215         | LRRC4C                                   |                                                             |
| 16  | 15.14-15.30   | 4.01629         | NTAN1, RRN3, MIR3180-4                   |                                                             |
| 2   | 97.68-97.85   | 3.99585         | FAHD2B, ANKRD36                          |                                                             |
| 4   | 159.35-159.44 | 3.9884          |                                          |                                                             |
| 2   | 104.76-104.83 | 3.97891         |                                          |                                                             |
| 17  | 73.30-73.44   | 3.96581         | GRB2, MIR3678                            |                                                             |
| 20  | 60.66-60.73   | 3.93865         | LSM14B, PSMA7, SS18L1                    |                                                             |
| 4   | 41.96-42.11   | 3.93681         | TMEM33, DCAF4L1,<br>SLC30A9              |                                                             |
| 15  | 28.19-28.27   | 3.91923         | OCA2                                     | (Chen <i>et al.</i> 2010)                                   |
| 1   | 158.15-158.24 | 3.89804         | CD1D, CD1A                               |                                                             |
| 13  | 41.39-41.54   | 3.8952          | SUGT1P3, ELF1                            |                                                             |
| 1   | 100.67-100.77 | 3.88985         | DBT, RTCD1, MIR553                       |                                                             |
| X   | 65.54-65.91   | 3.87444         | EDA2R                                    |                                                             |
| 17  | 53.79-53.87   | 3.87161         | TMEM100, PCTP                            |                                                             |
| 18  | 30.40-30.58   | 3.86989         | C18orf34                                 |                                                             |
| 1   | 248.07-248.16 | 3.86911         | OR2T8, OR2L13, OR2L81,<br>OR2AK2, OR2L1P |                                                             |
| 16  | 79.80-79.88   | 3.86909         |                                          | (Chen <i>et al.</i> 2010);<br>(Frazer <i>et al.</i> 2007)   |
| X   | 108.00-108.15 | 3.82083         |                                          |                                                             |
| 18  | 15.04-15.15   | 3.81846         |                                          | (Frazer <i>et al.</i> 2007)                                 |
| 2   | 167.50-167.60 | 3.81693         |                                          |                                                             |
| X   | 74.42-74.72   | 3.80593         | UPRT, ZDHHC15                            |                                                             |

The right-most column specifies the studies, if any, in which the corresponding regions were reported as showing signal of selection.
