# Supplementary material
Source: PubMed Central journal article supplement (PMC3761300)

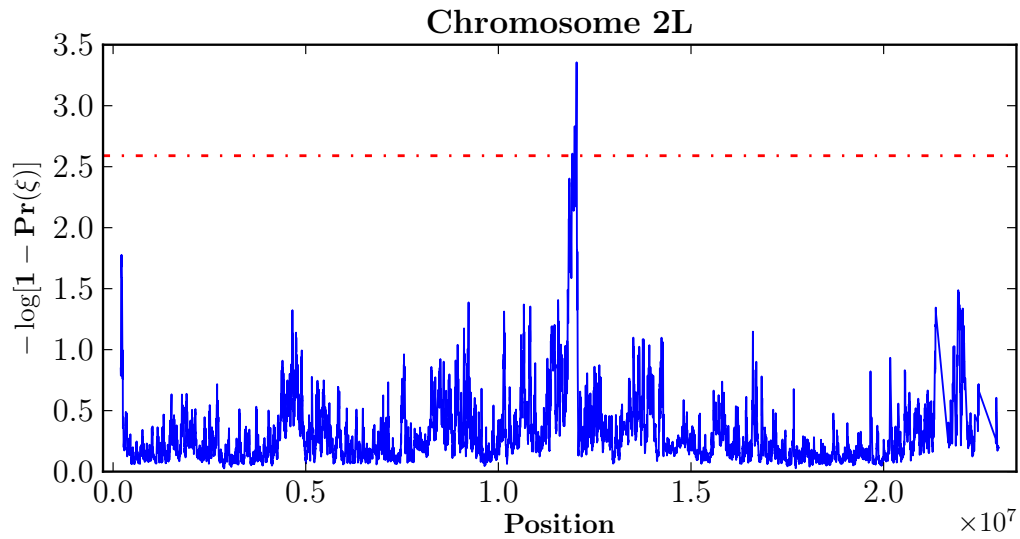

**Figure S5:** XP-SFselect values on *Drosophila* chromosome 2L.

Supplement: supp_113.152587_FigureS5.pdf [file supp_113.152587_FigureS5.pdf]

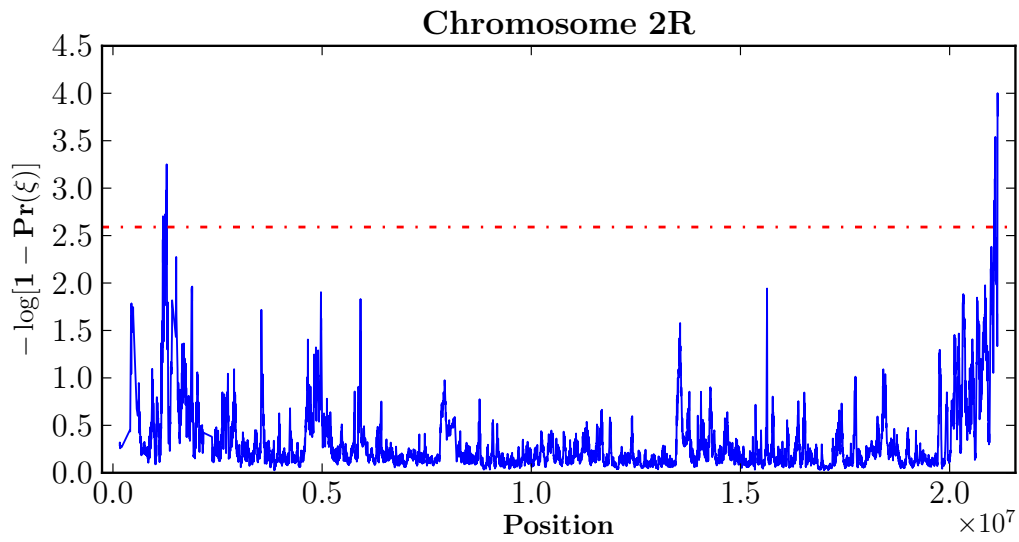

**Figure S6:** XP-SFselect values on *Drosophila* chromosome 2R.

Supplement: supp_113.152587_FigureS6.pdf [file supp_113.152587_FigureS6.pdf]

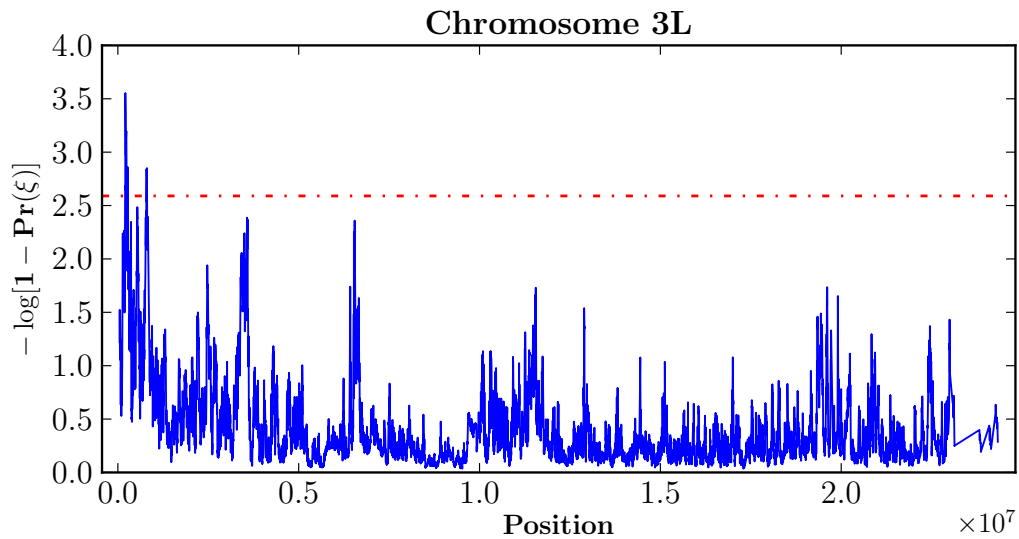

**Figure S7:** XP-SFselect values on Drosophila chromosome 3L.

Supplement: supp_113.152587_FigureS7.pdf [file supp_113.152587_FigureS7.pdf]

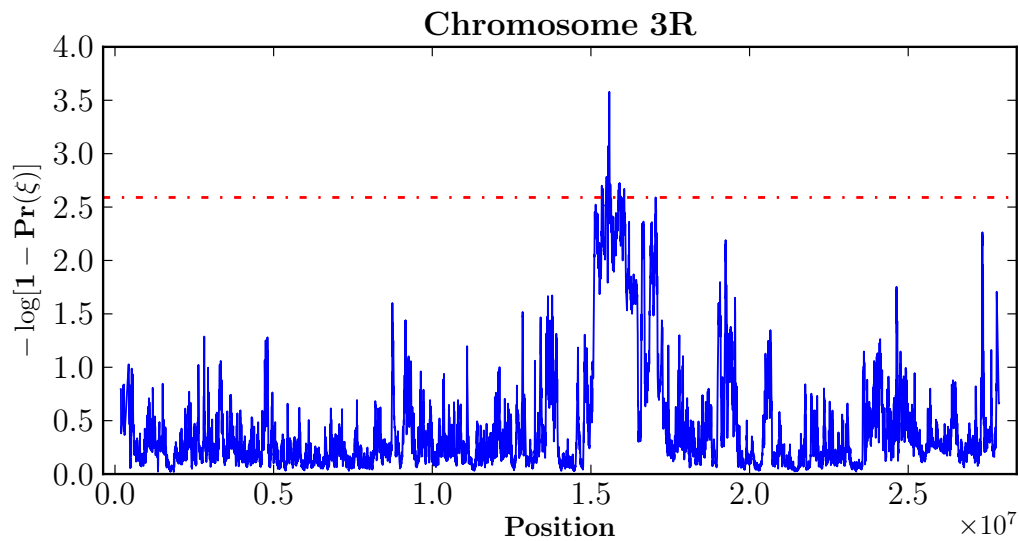

**Figure S8:** XP-SFselect values on *Drosophila* chromosome 3R.

Supplement: supp_113.152587_FigureS8.pdf [file supp_113.152587_FigureS8.pdf]
